# Supplementary figures and images for: Ferroptosis in Rat Lung Tissue during Severe Acute Pancreatitis-Associated Acute Lung Injury: Protection of Qingyi Decoction
Source: Hindawi journal article supplement (doi:10.1155/2023/5827613), 2023-02-11

# Protective mechanism of QYD in SAP-associated ALI rat model

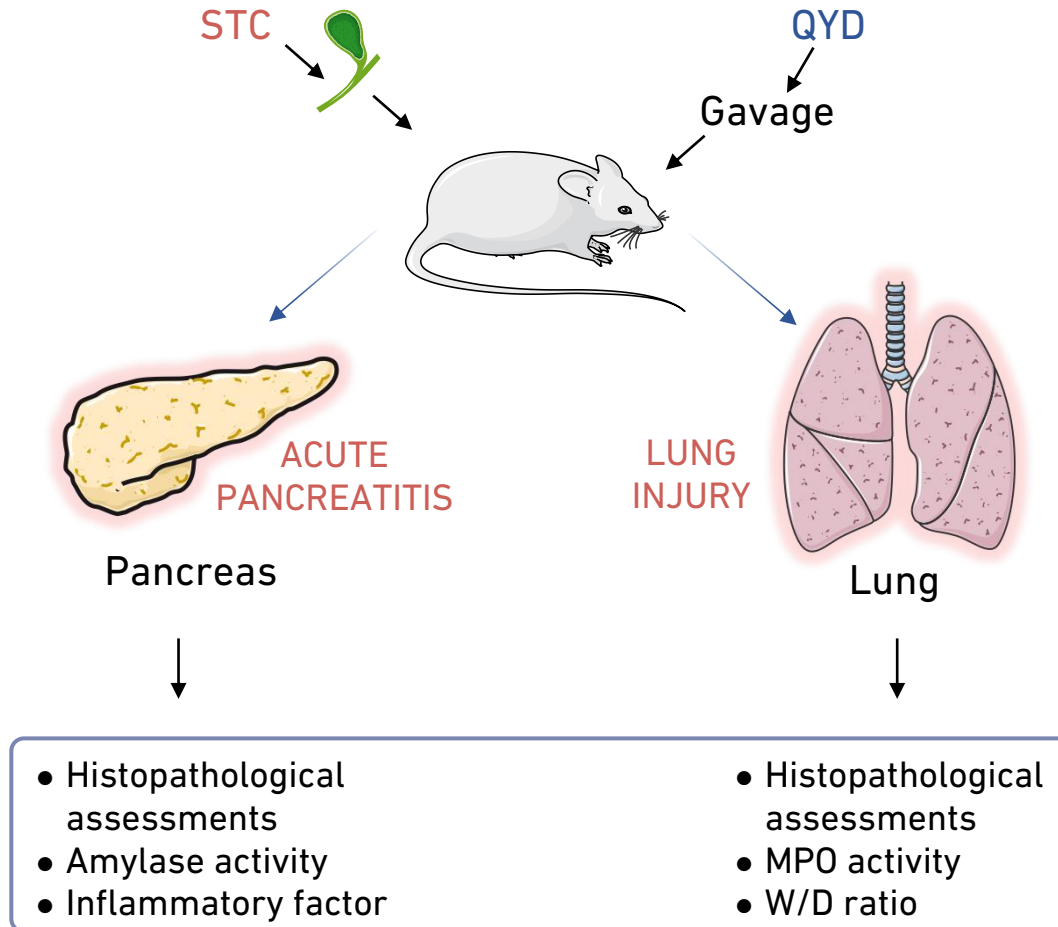

## QYD mode of action

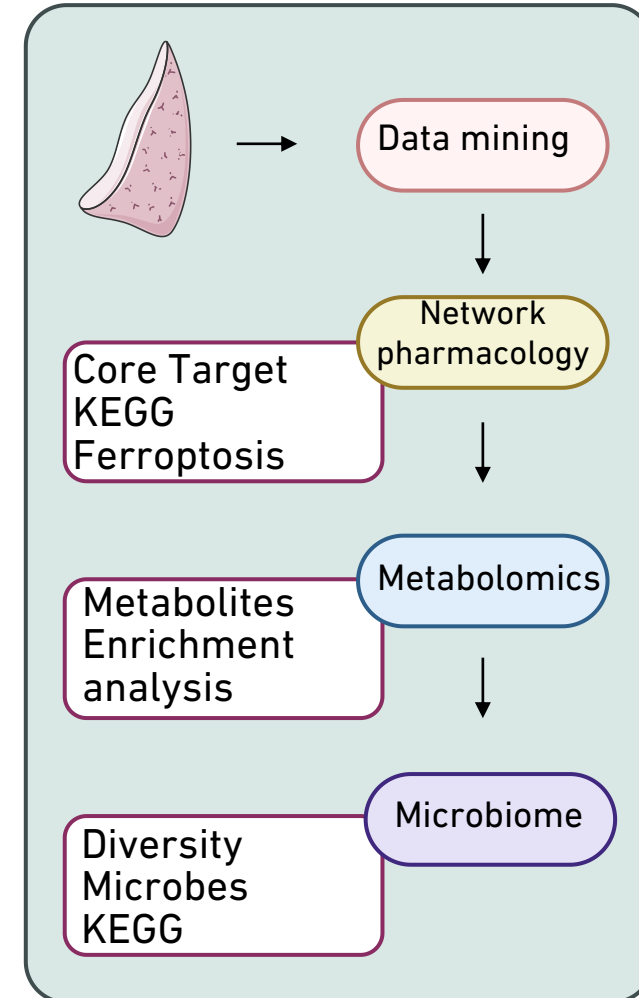

Supplement: f1 [file 5827613.f1.zip]
